# Supplementary material
Source: PubMed Central journal article supplement (PMC3987862)
Supplement: NIHMS556917-supplement-01.pdf [file NIHMS556917-supplement-01.pdf]

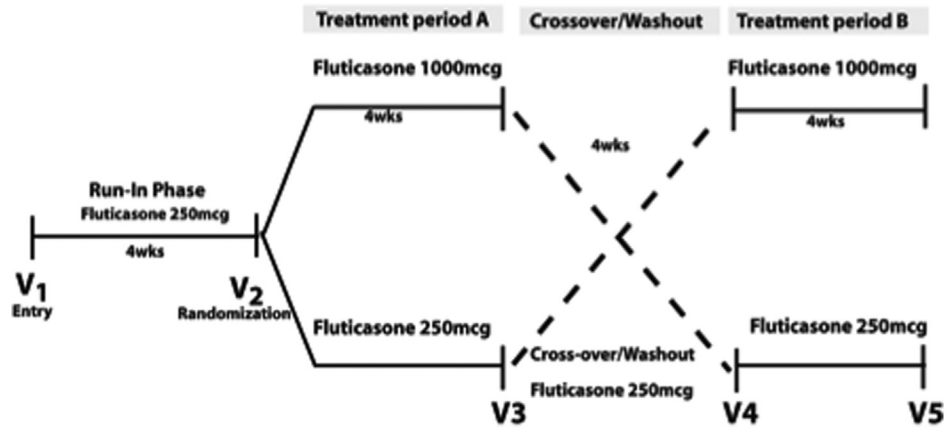

**Figure 1.** Study design. This study was part of a 2-phase clinical study: the first phase was a cross-sectional study evaluating the sensitivity and specificity of the methacholine challenge test,<sup>3</sup> which was completed at visit 1 (V1). Participants with asthma in the first phase of the study were recruited into the second phase of the study (randomized crossover trial) and underwent 4 visits (visits 2 to 5 [V2 to V5]) for this study.
